# Supplementary material for: Hybrid materials of Ni NP@MOF prepared by a simple synthetic method
Source: Royal Society of Chemistry journal article supplement (doi:10.1039/c5cc04663g), 2015-01-01
Supplement: c5cc04663g1.pdf [file c5cc04663g1.pdf]

## Supporting Information

### Hybrid Materials of Ni NP@MOF by a Simple Synthetic Method

Megumi Mukoyoshi,<sup>a</sup> Hirokazu Kobayashi,<sup>\*ab</sup> Kohei Kusada,<sup>ab</sup> Mikihiro Hayashi,<sup>a</sup> Teppei Yamada,<sup>a‡</sup> Mitsuhiro Maesato,<sup>a</sup> Jared M. Taylor,<sup>ab</sup> Yoshiki Kubota,<sup>c</sup> Kenichi Kato,<sup>de</sup> Masaki Takata,<sup>de</sup> Tomokazu Yamamoto,<sup>bf</sup> Syo Matsumura<sup>bfg</sup> and Hiroshi Kitagawa<sup>\*abhi</sup>

<sup>a</sup>Division of Chemistry, Graduate School of Science, Kyoto University, Kitashirakawa-Oiwakecho, Sakyo-ku, Kyoto 606-8502, Japan, <sup>b</sup>JST CREST, 7, Gobancho, Chiyoda-ku, Tokyo 102-0076, Japan, <sup>c</sup>Department of Physical Science, Graduate School of Science, Osaka Prefecture University, Sakai, Osaka 599-8531, Japan, <sup>d</sup>RIKEN SPring-8 Center, 1-1-1 Kouto, Sayo-cho, Sayo-gun, Hyogo 679-5148, Japan, <sup>e</sup>Japan Synchrotron Radiation Research Institute, 1-1-1 Kouto, Sayo-cho, Sayo-gun, Hyogo 679-5198, Japan, <sup>f</sup>Department of Applied Quantum Physics and Nuclear Engineering, Graduate School of Engineering, Kyushu University, Motooka 744, Nishi-ku, Fukuoka 819-0395, Japan, <sup>g</sup>Research Laboratory for High-Voltage Electron Microscopy, Kyushu University, Motooka 744, Nishi-ku, Fukuoka 819-0395, Japan, <sup>h</sup>Institute for Integrated Cell-Material Sciences (iCeMS), Kyoto University, Yoshida, Sakyo-ku, Kyoto 606-8501, Japan, <sup>i</sup>INAMORI Frontier Research Center, Kyushu University, Motooka 744, Nishi-ku, Fukuoka 819-0395, Japan

Current addresses

<sup>‡</sup> Center for Molecular Systems (CMS), Kyushu University, Motooka 744, Nishi-ku, Fukuoka 819-0395, Japan; Department of Chemistry and Biochemistry, Graduate School of Engineering, Kyushu University, Motooka 744, Nishi-ku, Fukuoka 819-0395, Japan

E-mail: hkobayashi@kuchem.kyoto-u.ac.jp, kitagawa@kuchem.kyoto-u.ac.jp

## **Table of contents**

Experimental section

S1 Thermogravimetric analysis

S2 X-ray diffraction measurements

S3 Fourier-transform infrared (FT-IR) spectroscopy measurements

S4 EDX maps

S5 TEM images

S6 Nitrogen sorption

S7, S8 Magnetic property measurements

## Experimental section

**General information.** 2, 5-Dihydroxyterephthalic acid was purchased from TCI. All other chemicals were purchased from Wako Pure Chemical Industries and used as received.

**Synthesis of Ni-MOF-74.** Ni<sub>2</sub>(dhtp) (Ni-MOF-74, CPO-27-Ni) was synthesized using a slight modification to an established procedure. To a solid mixture of H<sub>4</sub>dhtp (4.79 g, 24.2 mmol) and Ni(NO<sub>3</sub>)<sub>2</sub> · 6H<sub>2</sub>O (23.8 g, 81.8 mmol) was added a 1:1:1 (v/v/v) mixture of DMF–ethanol–water (2 L) in a 3 L eggplant flask. The suspension was mixed until homogeneous and then heated to 100 °C. After 5 days, the sample was cooled to RT. A yellow material was isolated and washed with methanol (1 L). The washing was repeated four times over 2 days. The material was then washed twice with deionised water (1 L). The solvent was removed under vacuum at RT over 1 day.

**TG-DTA.** The thermogravimetric analysis of Ni-MOF-74 was performed using a NETZSCH Japan TG-DTA 2,000SA with a heating rate of 2 K per min under a constant He flow.

**XRD measurements.** Powder X-ray diffraction (PXRD) patterns were measured using beamline BL02B2 of SPring-8 ( $\lambda = 0.998, 1.001 \text{ \AA}$ ).

**FT-IR spectra.** Fourier-transform infrared (FT-IR) spectra were collected using a Perkin-Elmer Spectrum 100.

**XPS spectra.** The XPS spectra of samples on a carbon sheet were recorded using an ESCA-3400 (Shimadzu). The binding energies were corrected by referencing the C(1s) line at 284.3 eV.

**TEM images.** Transmission electron microscope (TEM) images were obtained using a HITACHI HT7700 at an accelerating voltage of 100 kV. High-resolution scanning transmission electron microscope (HRSTEM) images were obtained using a JEM-ARM200F at accelerating voltages of 80 kV and 120 kV, respectively. The JEM-ARM200F was also equipped with an energy dispersive X-ray spectrometer (EDX) system that allows for the elemental analysis of samples.

**Nitrogen sorption.** N<sub>2</sub> adsorption/desorption isotherms were measured using a BELSORP-max at 77 K up to 1 bar. Before starting the adsorption measurements, each sample was activated by heating under vacuum at 120 °C for 12 h.

**Magnetic property measurements.** Magnetization curves and magnetic susceptibility were measured using a QUANTUM DESIGN MPMS-XL, and AC susceptibility was measured using a QUANTUM DESIGN MPMS-5S.

**Table S1. Synthesis conditions and sample names for Ni NP@MOF.**

|        | 6 h    | 12 h    | 24 h    | 3 days | 7 days |
|--------|--------|---------|---------|--------|--------|
| 250 °C | 250-6h | 250-12h | 250-24h |        | 250-7d |
| 300 °C | 300-6h | 300-12h | 300-24h | 300-3d |        |
| 350 °C | 350-6h | 350-12h | 350-24h |        |        |
| 400 °C | 400-6h | 400-12h | 400-24h |        |        |

**S1 Thermogravimetric analysis (TGA) for Ni-MOF-74**

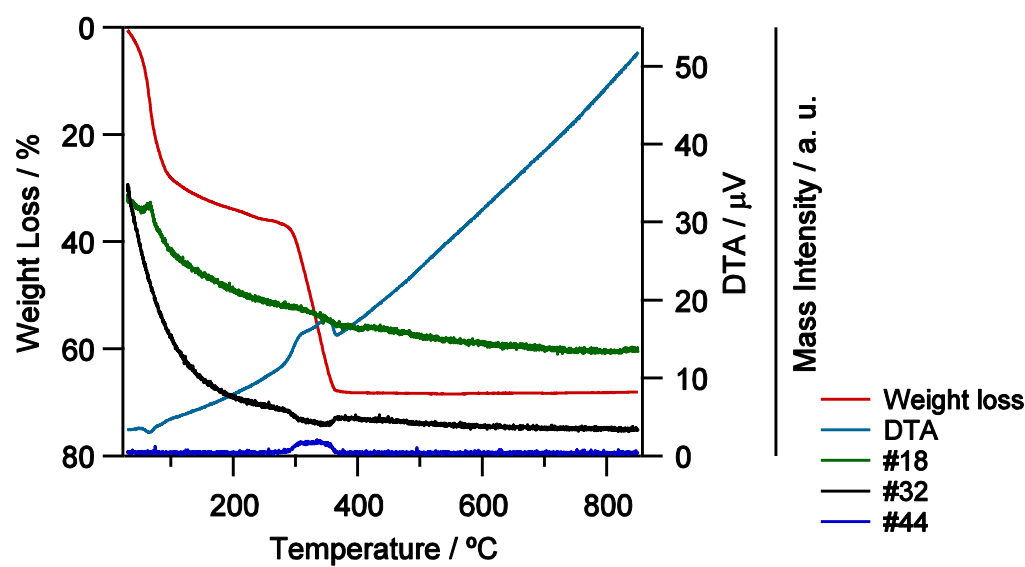

**Figure S1.** Thermogravimetric analysis (TGA) curves of Ni-MOF-74 (in He flow).

## S2 X-ray diffraction measurements

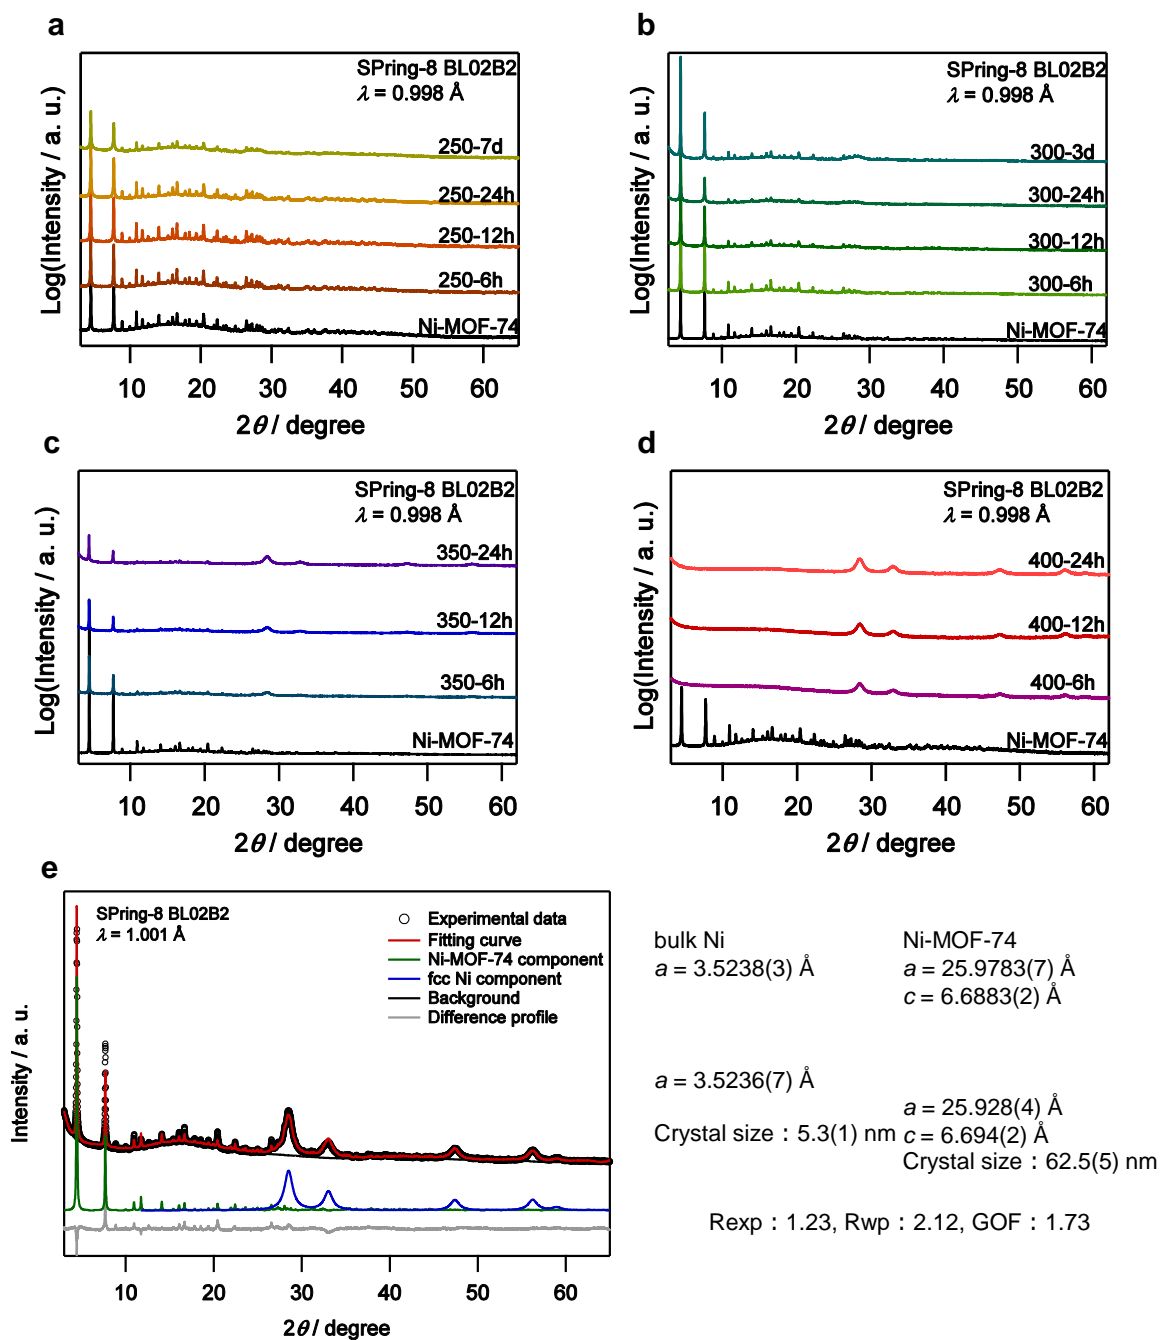

**Figure S2.** Powder X-ray diffraction (PXRD) patterns of **250-6h**, **250-12h**, **250-24h**, and **250-7d** (a), **300-6h**, **300-12h**, **300-24h**, and **300-3d** (b), **350-6h**, **350-12h**, and **350-24h** (c), **400-6h**, **400-12h**, and **400-24h** (d), and the result of Rietveld analysis for **350-12h** (e).

### S3 FT-IR

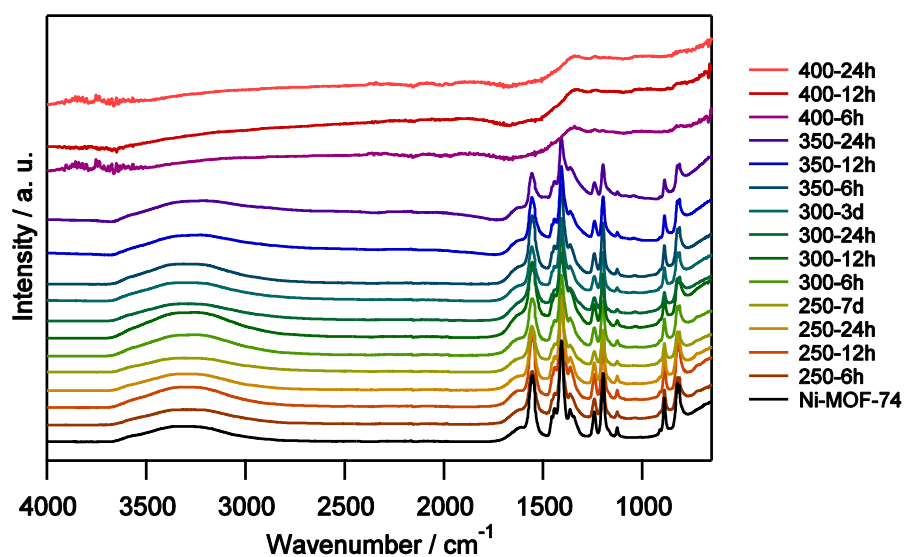

**Figure S3.** Fourier-transform infrared (FT-IR) spectra of Ni-MOF-74 and composites.

### S4 EDX maps

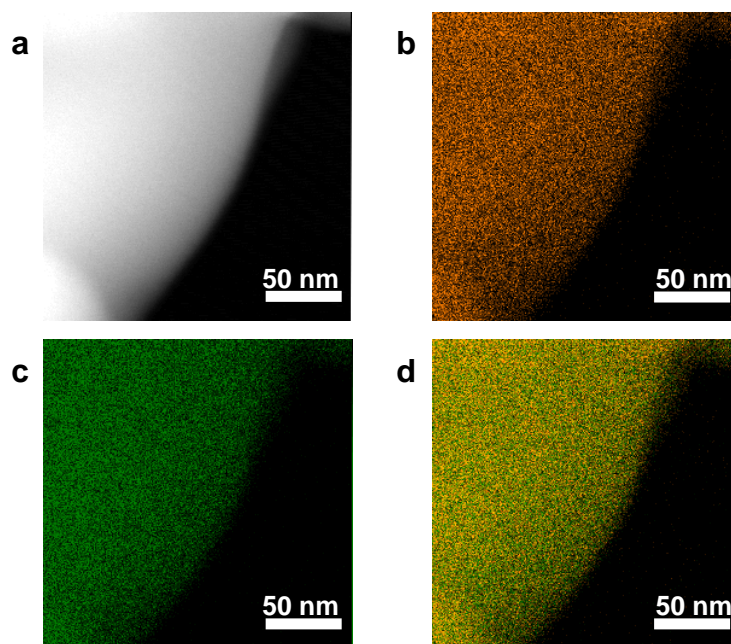

**Figure S4.** HAADF-STEM image (a), C-K STEM-EDX map (b) and Ni-K STEM-EDX map (c) of Ni-MOF-74. (d) The reconstructed overlay image of the maps shown in (b) and (c).

## S5 TEM images

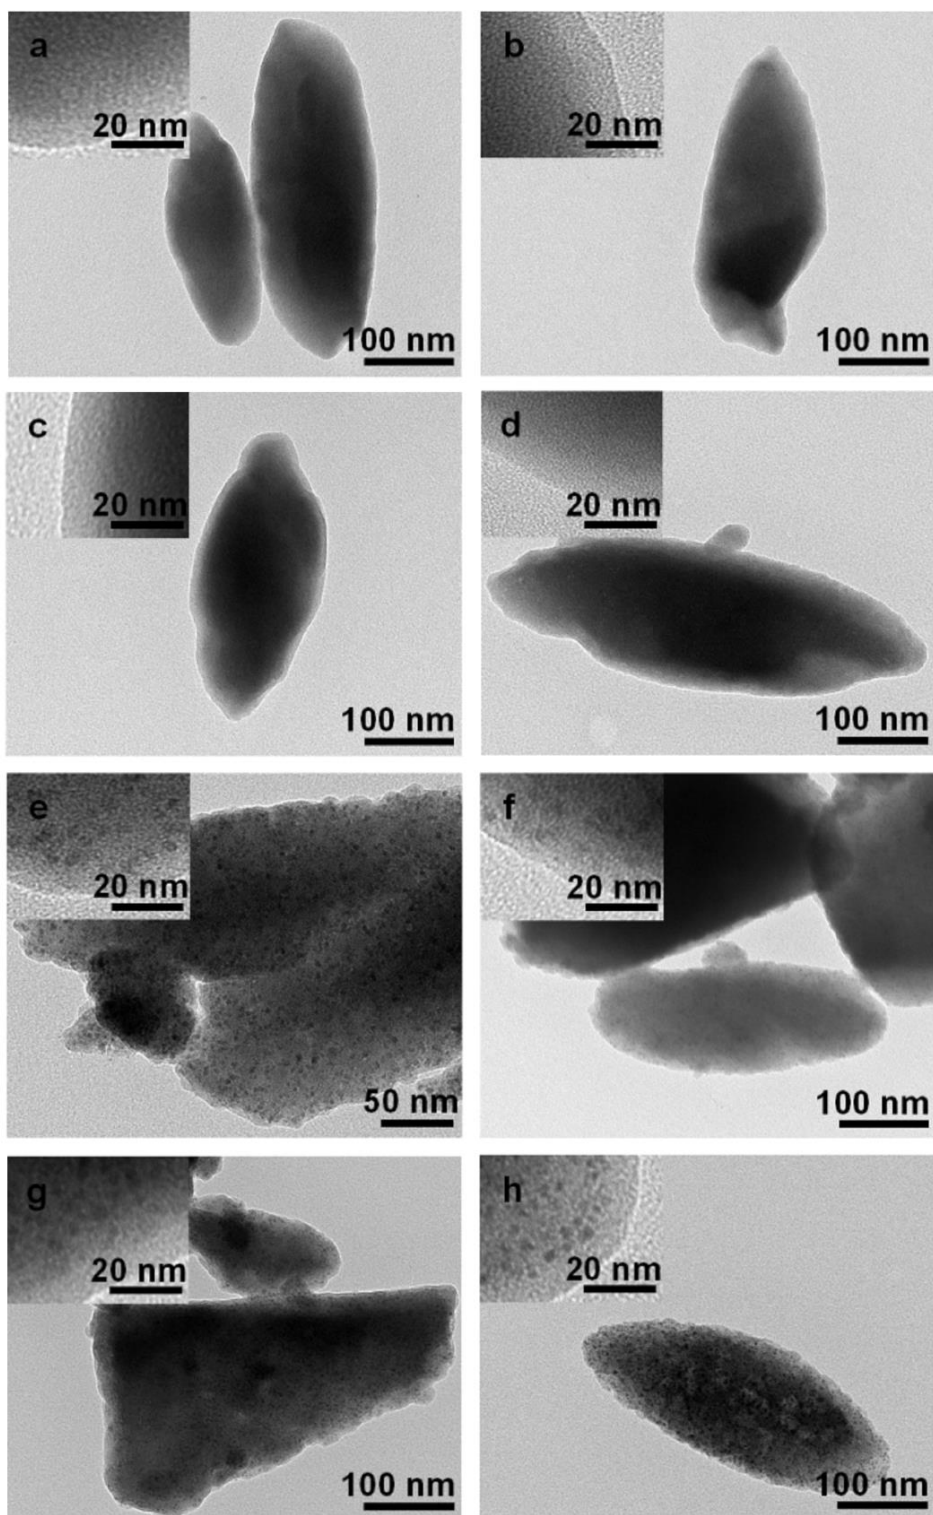

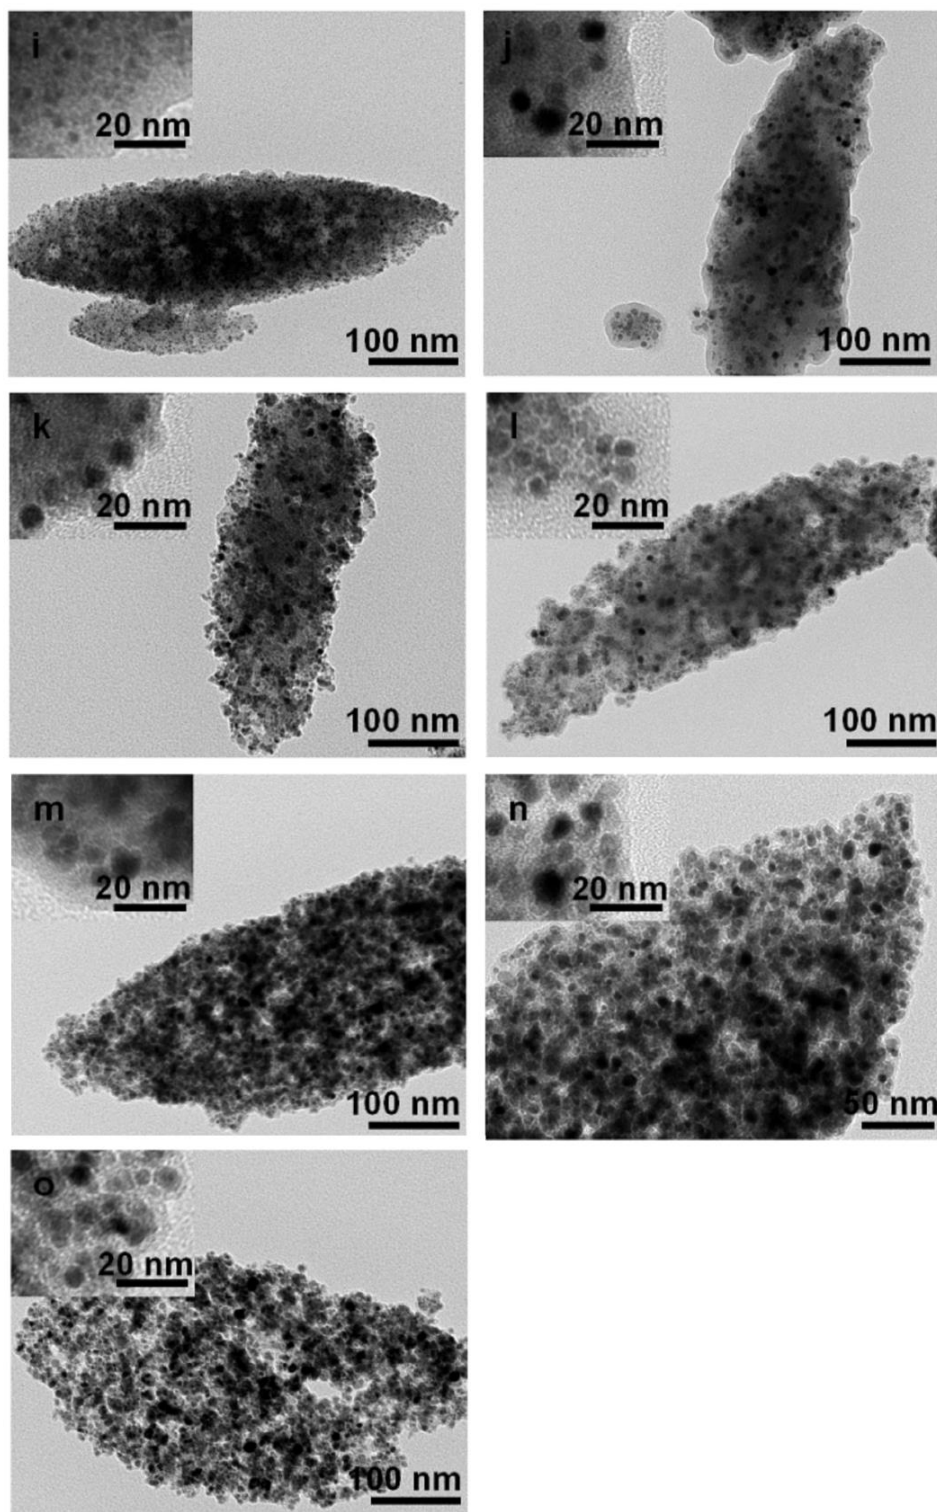

**Figure S5.** TEM images of Ni-MOF-74 (a), 250-6h (b), 250-12h (c), 250-24h (d), 250-7d (e), 300-6h (f), 300-12h (g), 300-24h (h), 300-3d (i), 350-6h (j), 350-12h (k), 350-24h (l), 400-6h (m), 400-12h (n), and 400-24h (o).



**Table S2. Mean diameter of Ni nanoparticles.**

|        | 6 h           | 12 h          | 24 h          | 3 days        | 7 days        |
|--------|---------------|---------------|---------------|---------------|---------------|
| 250 °C |               |               |               |               | $2.5 \pm 0.6$ |
| 300 °C | $2.2 \pm 0.4$ | $2.3 \pm 0.6$ | $2.4 \pm 0.5$ | $3.0 \pm 0.6$ |               |
| 350 °C | $4.0 \pm 1.4$ | $4.3 \pm 1.4$ | $4.6 \pm 1.3$ |               |               |
| 400 °C | $4.3 \pm 1.1$ | $4.5 \pm 1.2$ | $5.0 \pm 1.2$ |               |               |

## S6 Nitrogen sorption

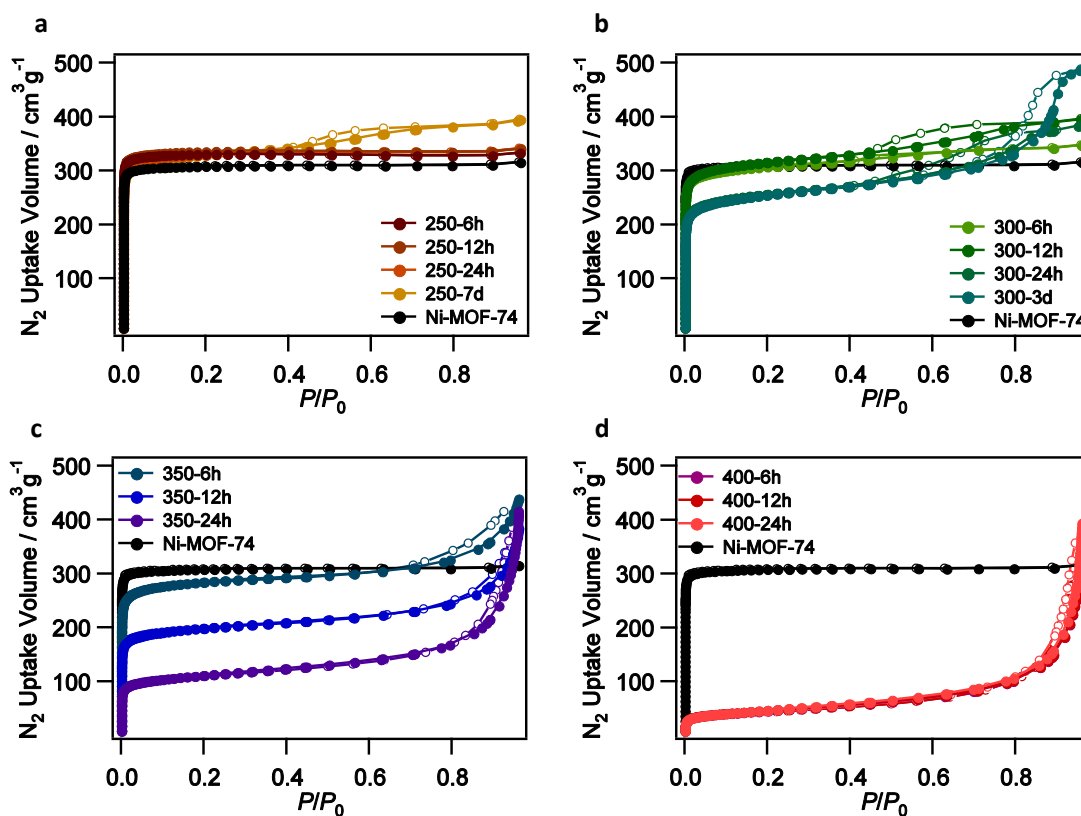

**Figure S6.** Nitrogen sorption isotherms for 250-6h, 250-12h, 250-24h, and 250-7d (a), 300-6h, 300-12h, 300-24h, and 300-3d (b), 350-6h, 350-12h, and 350-24h (c), 400-6h, 400-12h, and 400-24h (d) at 77 K up to 1 bar. The solid and open symbols represent adsorption and desorption, respectively.

## S7, S8 Magnetic property measurements

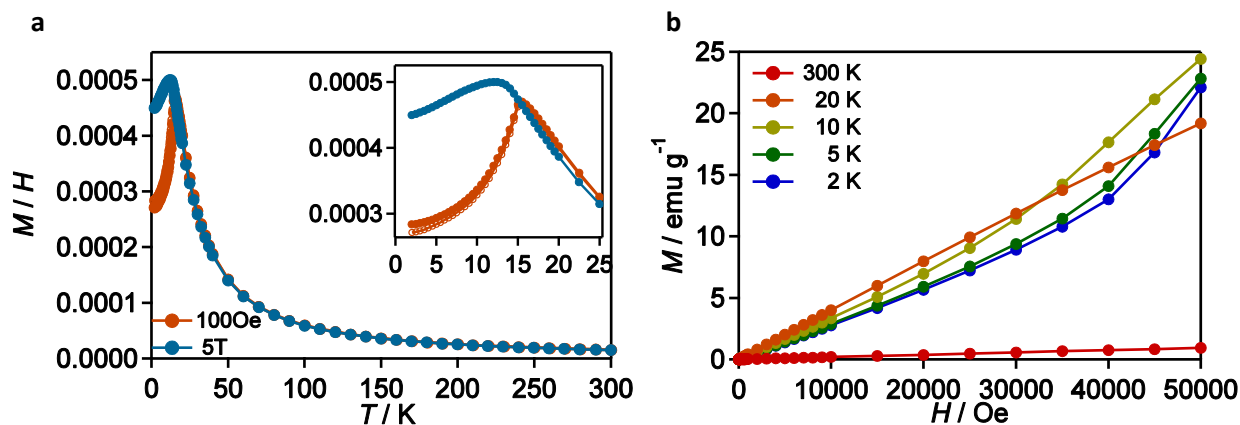

**Figure S7.** (a) The magnetic susceptibility as a function of temperature for Ni-MOF-74 (the open and solid symbols represent zero-field-cooled (ZFC) and field-cooled (FC), respectively). (b) Magnetization as a function of magnetic field for Ni-MOF-74. The kink structure around 4T indicates spin flop.

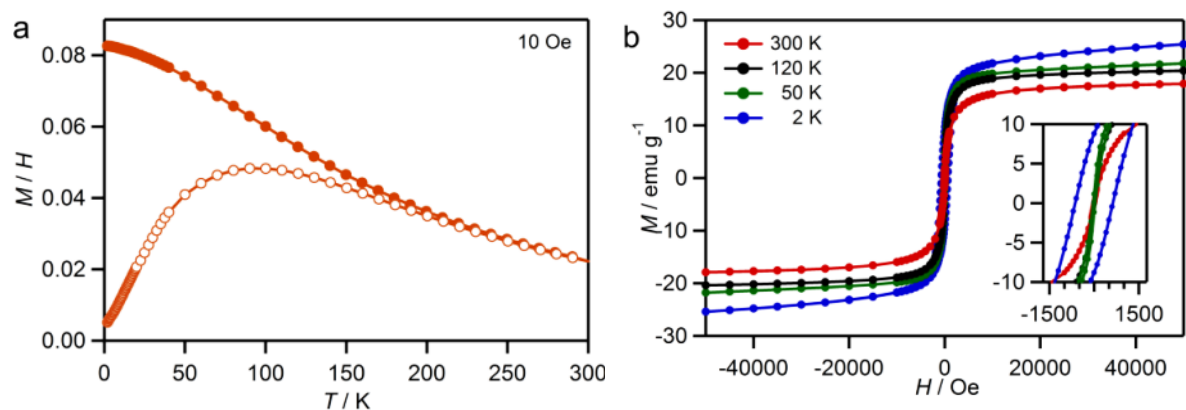

**Figure S8.** (a) The magnetic susceptibility as a function of temperature for **400-12h** at 10 Oe. The open and solid symbols represent zero-field-cooled (ZFC) and field-cooled (FC), respectively). (b) Magnetization as a magnetic field for **400-12h** at 2 K (blue circle), 50 K (green circle), 120 K (black circle) and 300 K (red circle).
